CORRECTION

## Correction: Phytochemical profiling of *Vitex negundo* seeds via UHPLC-QTOF-MS/MS analyses with antimicrobial evaluation and in silico targeting of DNA Gyrase B and Secreted Aspartic Proteinase 2 (SAP2)

Javed Mustafa, Tuba Ashraf, Basharat Ali, Shazia Kousar, Adeem Mahmood, Saif Ullah, Muhammad Imran, Bakhat Ali, Usman Rahim, Muhammad Yunis

The seventh author, Muhammad Imran, should not be noted as the corresponding author.

### Reference

1. Mustafa J, Ashraf T, Ali B, Kousar S, Mahmood A, Ullah S, et al. Phytochemical profiling of *Vitex negundo* seeds via UHPLC-QTOF-MS/MS analyses with antimicrobial evaluation and in silico targeting of DNA Gyrase B and Secreted Aspartic Proteinase 2 (SAP2). PLoS One. 2026;21(3):e0343965. <https://doi.org/10.1371/journal.pone.0343965>

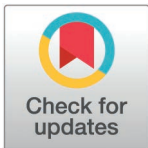

### OPEN ACCESS

**Citation:** Mustafa J, Ashraf T, Ali B, Kousar S, Mahmood A, Ullah S, et al. (2026) Correction: Phytochemical profiling of *Vitex negundo* seeds via UHPLC-QTOF-MS/MS analyses with antimicrobial evaluation and in silico targeting of DNA Gyrase B and Secreted Aspartic Proteinase 2 (SAP2). PLoS One 21(5): e0349766. <https://doi.org/10.1371/journal.pone.0349766>

**Published:** May 22, 2026

**Copyright:** © 2026 Mustafa et al. This is an open access article distributed under the terms of the [Creative Commons Attribution License](https://creativecommons.org/licenses/by/4.0/), which permits unrestricted use, distribution, and reproduction in any medium, provided the original author and source are credited.
